# Supplementary material
Source: Springer Nature journal article supplement (https://www.springermedizin.de/resource/supplementary/13023_2014_719_MOESM3_ESM.pdf/9642914)
Supplement: MOESM3 [file 9642914]

Identification of a topic for action



Draft preliminary report



Multi-stakeholder workshop for discussion/elaboration of draft report/recommendation



Submission of final draft of report/recommendation to EUCERD for feedback



Finalisation and adoption of report/recommendation by EUCERD
